# Supplementary material for: Photoreversible dendritic organogel
Source: Royal Society of Chemistry journal article supplement (doi:10.1039/b708239h), 2007-01-01
Supplement: b708239h.pdf [file b708239h.pdf]

## Photoreversible Dendritic Organogel

Yan Ji<sup>a</sup>, Gui-Chao Kuang<sup>a</sup>, Xin-Ru Jia<sup>\*a</sup>, Er-Qiang Chen<sup>\*a</sup>, Bing-Bing Wang<sup>a</sup>, Wu-Song Li<sup>a</sup>, Yen

Wei<sup>\*b</sup>, Lei Jiang<sup>c</sup>

<sup>a</sup>Department of Polymer Science and Engineering and Key Laboratory of Polymer Chemistry and Physics of the Ministry of Education, College of Chemistry and Molecular Engineering, Peking University, Beijing 100871 China.

<sup>b</sup>Department of Chemistry, Drexel University, Philadelphia, PA 19104 (USA)

<sup>c</sup>center for Molecular Sciences, Institute of Chemistry, Chinese Academy of Sciences, Beijing

\*To whom correspondence should be addressed. E-mail: [xrjia@pku.edu.cn](mailto:xrjia@pku.edu.cn), [eqchen@pku.edu.cn](mailto:eqchen@pku.edu.cn), [weiyen@drexel.edu](mailto:weiyen@drexel.edu)

### General

Unless stated otherwise, all reagents and common solvents were obtained from commercial sources and used as received. <sup>1</sup>H NMR and <sup>13</sup>C NMR spectra were recorded on Bruker 400 MHz spectrometer. Matrix-assisted laser desorption/ionization time-of-flight (MALDI-TOF) mass-spectra were acquired on a BIFLE XIII time-of-flight MALDI mass spectrometer with  $\alpha$ -cyano-4-hydroxycinnamic acid (CCA) as the matrix. FT-IR spectra were obtained using a Bruker VECTOR22 IR spectrometer. Tapping-mode Atomic Force Microscopy (AFM) measurement was performed using a SPA-400 Multimode AFM and SPI3800N Probe Station. For the preparation of AFM samples, the loose gel was dropped on a freshly cleaved mica surface and air-dried at room temperature before imaging. Powder wide-angle X-ray diffraction (WAXD) patterns of xerogels were obtained using a Bruker D8 Discover diffractometer with GADDS as a 2D detector. Air scattering was subtracted from the sample patterns. Diffraction patterns were recorded in a transmission mode at room temperature employing Cu K $\alpha$  radiation. Gel was naturally dried for two days at room temperature before WAXD experiment. DSC measurements were carried out on a Thermal Analysis Q 100 DSC system.

**Synthesis**

TFA·NH<sub>2</sub>-G<sub>2</sub> was synthesized according to ref 1. 4-(*p*-Hydroxyphenylazo)benzoic acid was obtained according to ref 2.

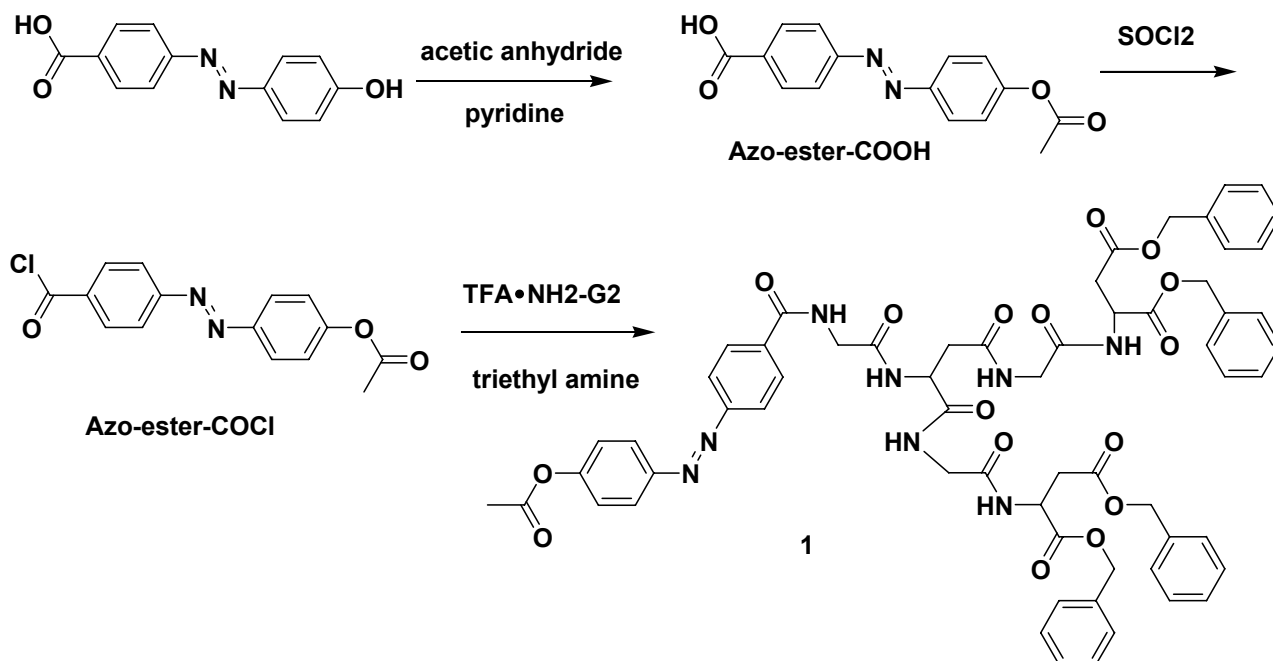

4-(*p*-Hydroxyphenylazo) benzoic acid (0.12 g, 0.5 mmol), acetic anhydride (1.02 g, 8 mmol) and pyridine (0.78 g, 10 mmol) were refluxed for 3 hours. The reaction mixture was poured into ice water and acidified by 10% HCl to pH = 6. The precipitate was recrystallized with methanol. The obtained ester was refluxed in SOCl<sub>2</sub> for 3 hours and the solvent was evaporated to dryness under reduced pressure. 25 mL CH<sub>2</sub>Cl<sub>2</sub> was added and evaporated again. To a CHCl<sub>3</sub> (2 mL) solution Azo-ester-ClO (0.04 g, 1.34 mmol) was added dropwise a CHCl<sub>3</sub> solution of TFA·NH<sub>2</sub>-G<sub>2</sub> (0.2 g, 0.19 mmol) and triethylamine (0.5 mL). After the reaction mixture was stirred for 24 hours under an atmosphere of N<sub>2</sub>, the solvents were evaporated. The residue was dissolved in a small amount of 1:9 CH<sub>3</sub>OH:CHCl<sub>3</sub>, precipitated in cold diethyl ether, filtered, and dried. The crude product was precipitated by diethyl ether and subjected to column chromatography (SiO<sub>2</sub>:CH<sub>2</sub>Cl<sub>2</sub>/MeOH 10:1). Yield: 30%; <sup>1</sup>H NMR (400 MHz, d<sub>6</sub>-DMSO, RT, TMS): δ = 8.87-8.27 (m, 6H, NHCO), 8.09-7.88 (m, N<sub>2</sub>C<sub>6</sub>H<sub>4</sub>CO), 7.38-7.32 (m, 20H, Ar-H), 7.10-6.89 (m, N<sub>2</sub>C<sub>6</sub>H<sub>4</sub>CO), 5.09-5.05 (m, 8H, COCH<sub>2</sub>C<sub>6</sub>H<sub>5</sub>), 4.79 - 4.72 (m, 2H, NHCHCO), 4.64-4.62 (m, 1H, NHCHCO), 3.98-3.3.95 (m, 2H, NHCH<sub>2</sub>CO), 3.77-3.73 (m, 4H, NHCH<sub>2</sub>CO), 2.93-2.56 (m, 6H, CHCH<sub>2</sub>CO), 2.32-2.21(d, 3H, COCH<sub>3</sub>) ppm. <sup>13</sup>C NMR (400 MHz, RT, d<sub>6</sub>-DMSO) δ = 170.67-168.38 (CH<sub>2</sub>CO), 165.71 (N<sub>2</sub>ArCO), 161.52(C<sub>6</sub>H<sub>4</sub>OH) 153.21-152.84 (N<sub>2</sub>C<sub>6</sub>H<sub>4</sub>CO), 149.37 (N<sub>2</sub>C<sub>6</sub>H<sub>4</sub>OH), 135.94 - 135.38 (CH<sub>2</sub>C<sub>6</sub>H<sub>5</sub>), 128.27-127.25 (Ar-C), 123.56 (C<sub>6</sub>H<sub>4</sub>OCO), 122.47 (C<sub>6</sub>H<sub>4</sub>OCO), 121.90 (C<sub>6</sub>H<sub>4</sub>OCO),

65.99-65.54 (OCH<sub>2</sub>C<sub>6</sub>H<sub>5</sub>), 49.84-48.44 (NHCH<sub>2</sub>CO), 42.72-41.70 (NHCH<sub>2</sub>CO), 37.13 (CHCH<sub>2</sub>CO), 35.60 (CHCH<sub>2</sub>CO), 20.46(COCH<sub>3</sub>) ppm. MALDI-TOF C<sub>61</sub>H<sub>60</sub>N<sub>8</sub>O<sub>16</sub> *m/z* Cal. 1160, found [M + Na] 1183, [M + K] 1199.

**FT-IR spectra:**

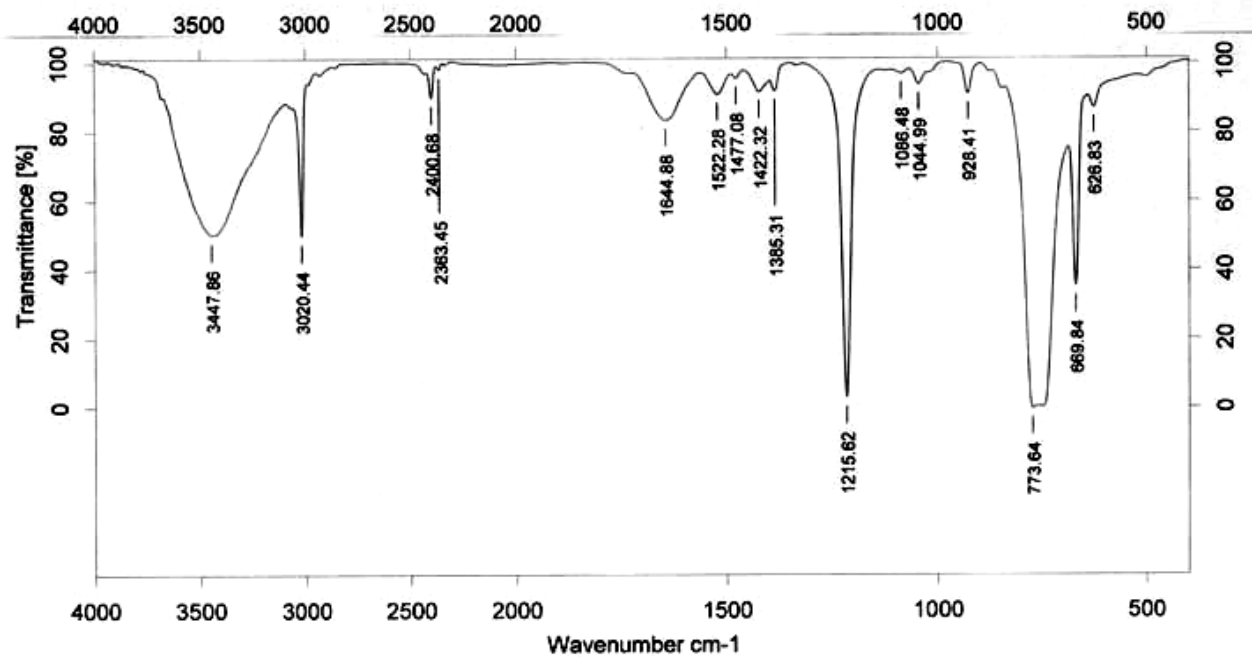

**Figure S-1.** IR spectrum of 1 in CHCl<sub>3</sub> solution

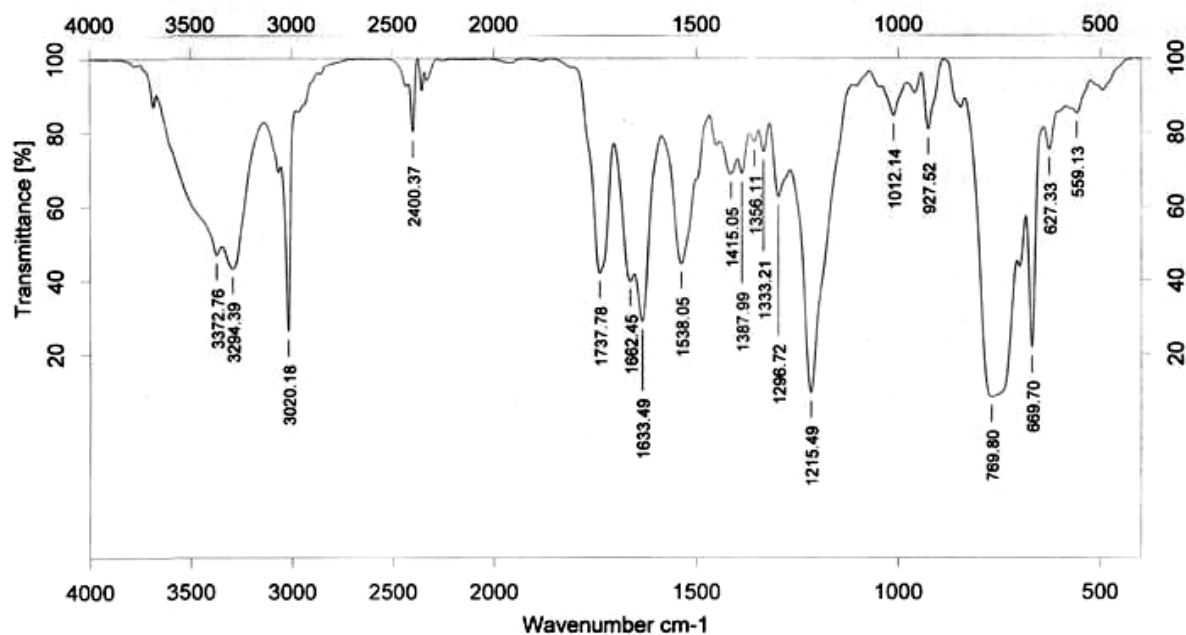

**Figure S-2.** IR spectrum of 1 in CHCl<sub>3</sub> gel

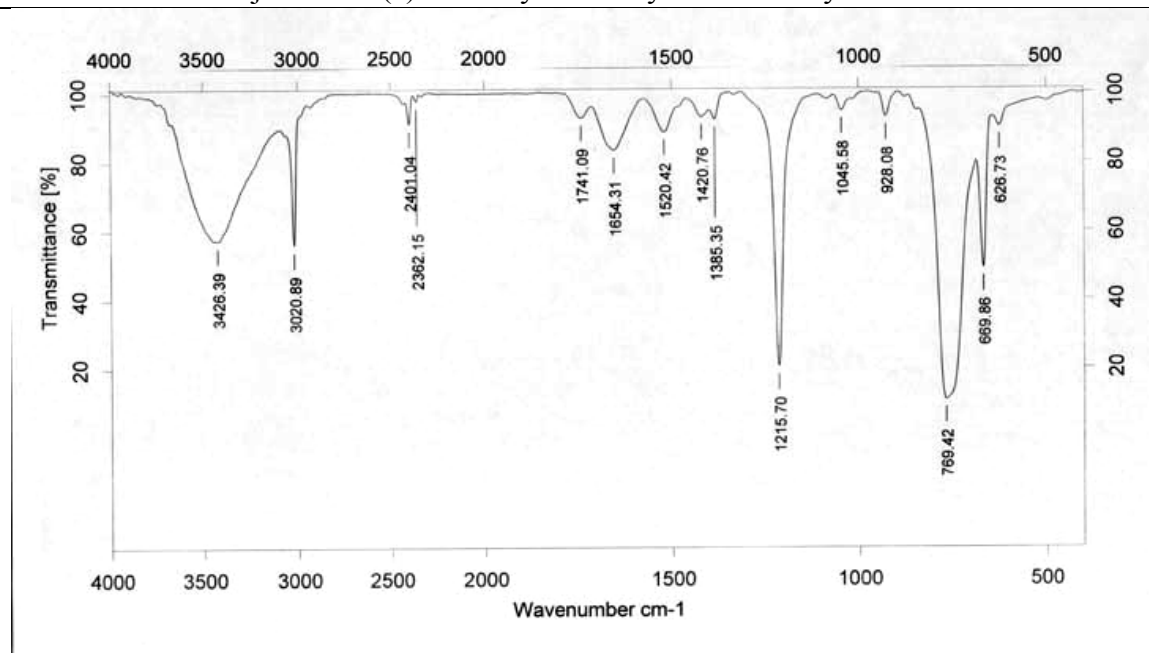

*Figure S-3.* IR spectrum of **1** in CHCl<sub>3</sub> solution obtained from gel irradiated by UV

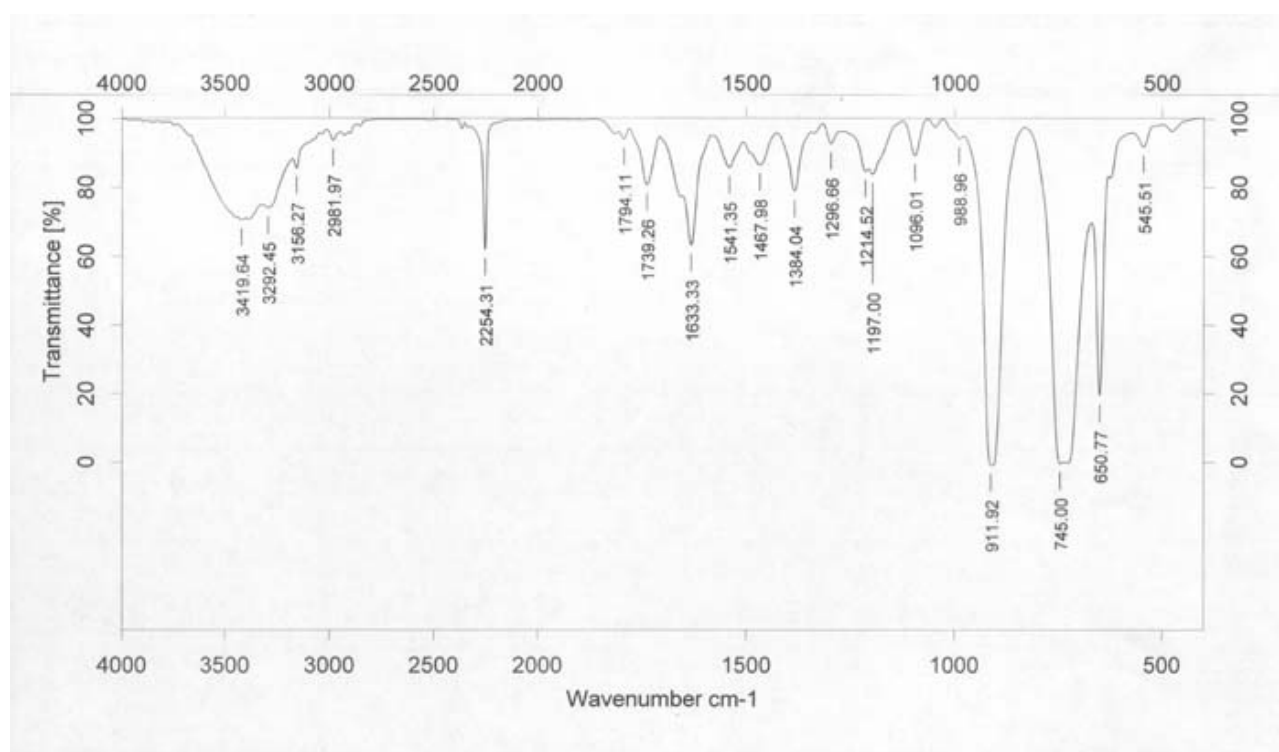

*Figure S-4.* IR spectrum of **1** in reformed CHCl<sub>3</sub> gel

*UV spectra of 1 (in solution of ethyl acetate and gel phase):*

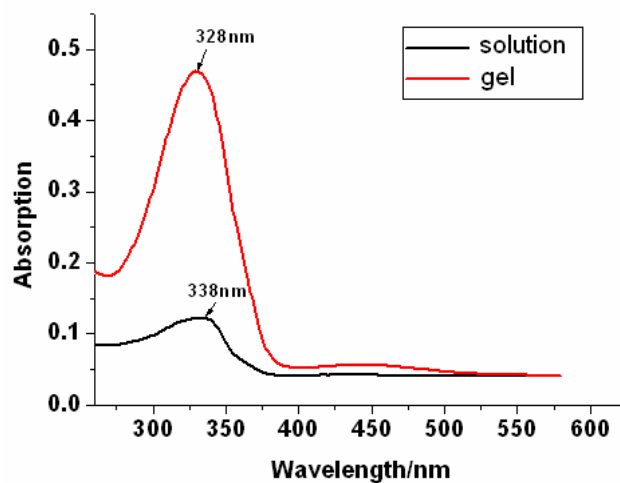

*Figure S-5* UV-vis spectra of **1** acetate solution and gel (Solution concentration:  $1.5 \times 10^{-5}$  M, gel concentration:  $1.1 \times 10^{-3}$  M)

*NMR spectra:*

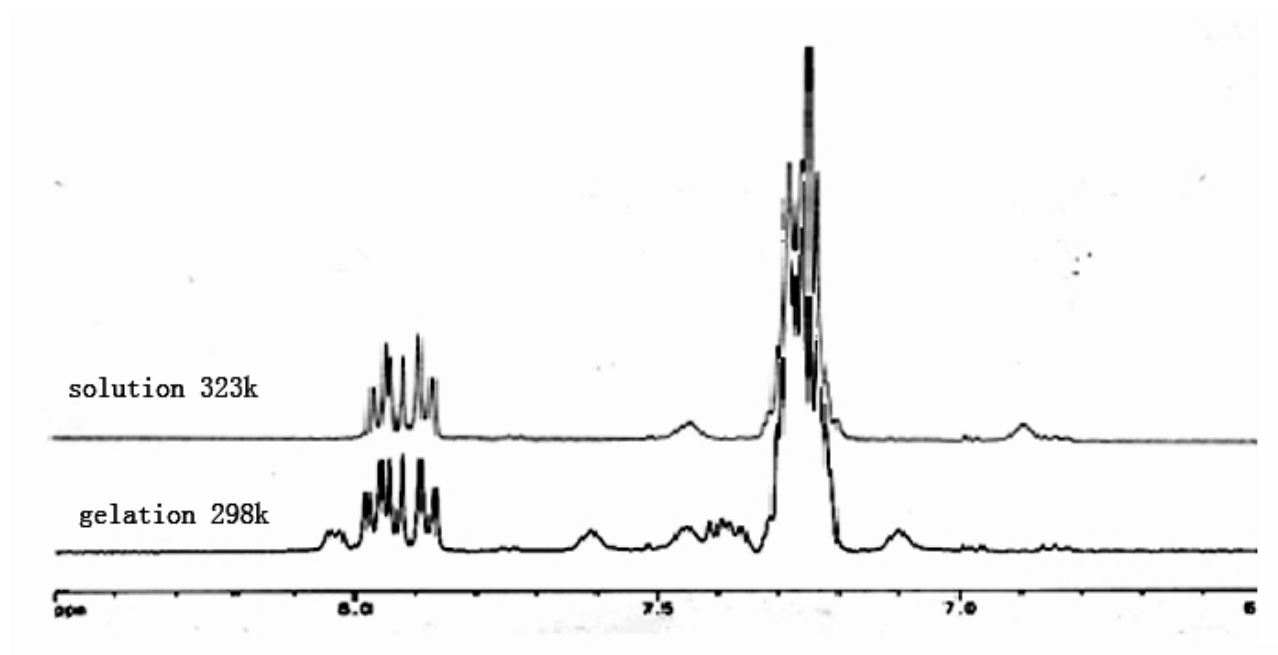

*Figure S-6* H-NMR spectra of **1** (10.8 mg/ml in CDCl<sub>3</sub>) in gel state (RT) and in solution (50 °C)

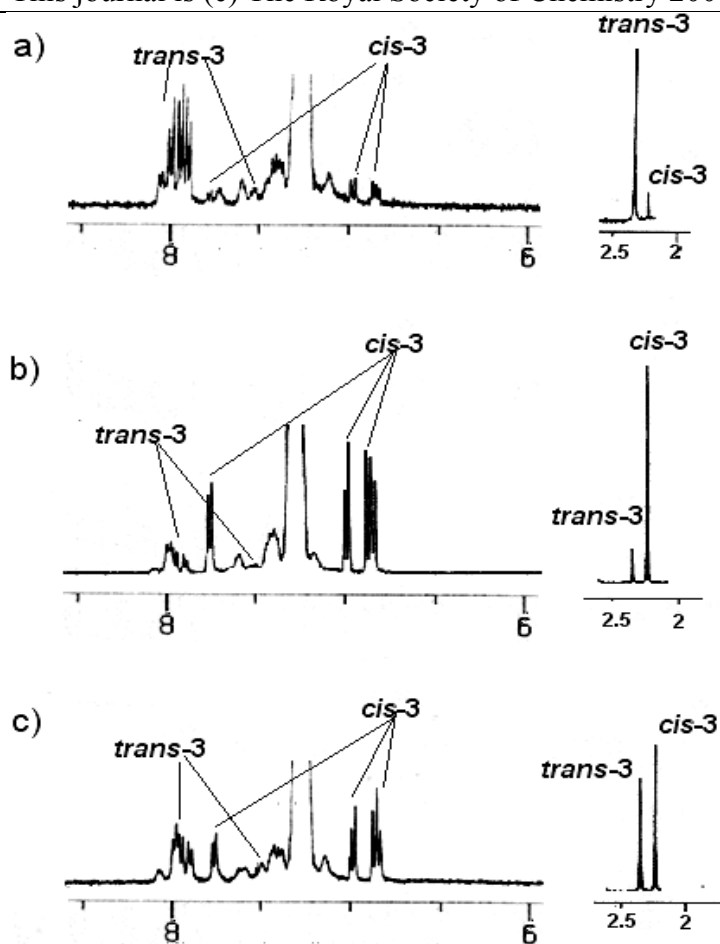

**Figure S-7.**  $^1\text{H}$  NMR spectra of **1** in the  $\text{CDCl}_3$  gel (a), the *cis*-rich solution (b), and the reformed gel (c). The concentration of **1** is 20 mg/mL.

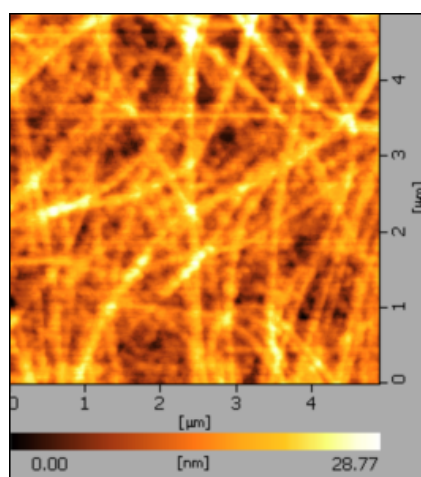

**Figure S-8.** AFM height image of xerogel of **1** after drying from ethyl acetate gel ( $[\mathbf{1}] = 0.1\text{wt}\%$ )

*Wide-angle X-ray diffraction of reformed xerogel 1:*

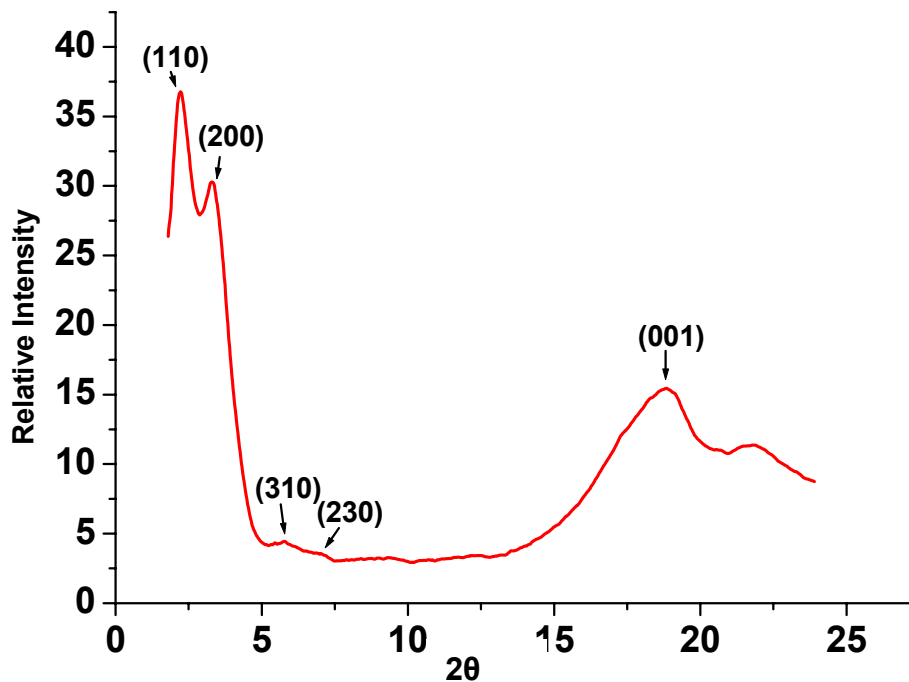

*Figure S-9.* WAXD patterns of the dried reformed **1** gel at 70°C

*DSC of xerogel:*

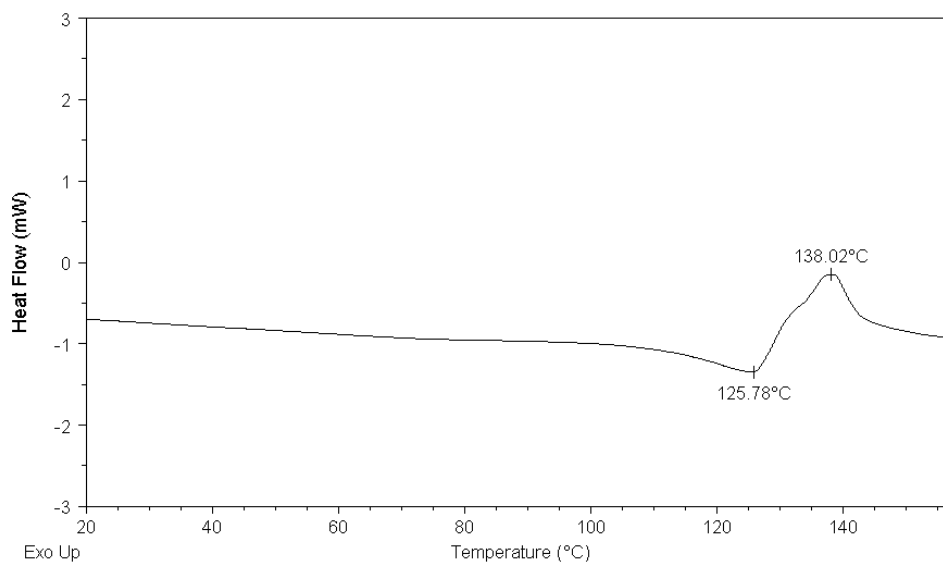

*Figure S-10.* DSC of the **1** xerogel (heating rate: 10°C/min)

**Reference**

1. Y. Ji, Y. F. Luo, X. R. Jia, E. Q. Chen, Y. Huang, C. Ye, B. B. Wang, Q. F. Zhou, Y. Wei, *Angew. Chem. Int. Ed. Engl.* **2005**, *44*, 6025-6029.
2. L. Corvazier, Y. Zhao, *Macromolecules* **1999**, *32*, 3195-3200.
